# Supplementary material for: Red fluorescent CEPIA indicators for visualization of Ca2+ dynamics in mitochondria
Source: Sci Rep. 2020 Feb 18;10:2835. doi: 10.1038/s41598-020-59707-8 (PMC7029041; doi:10.1038/s41598-020-59707-8)
Supplement: Supplementary file 1 — Sepplementary Information. [file 41598_2020_59707_MOESM1_ESM.pdf]

## Red fluorescent CEPIA indicators for visualization of $\text{Ca}^{2+}$ dynamics in mitochondria

Kazunori Kanemaru<sup>1#</sup>, Junji Suzuki<sup>2#</sup>, Isamu Taiko<sup>1,3</sup> and Masamitsu Iino<sup>1\*</sup>

1: Division of Cellular and Molecular Pharmacology, Nihon University School of Medicine, Tokyo 173-8610, Japan.

2: Department of Physiology, University of California San Francisco, San Francisco, CA 94158, USA.

3: Department of Physiology, Nihon University School of Medicine, Tokyo 173-8610, Japan.

#: Equal contribution

\*: Correspondence should be addressed to Masamitsu Iino, Division of Cellular and Molecular Pharmacology, Nihon University School of Medicine, Tokyo 173-8610, Japan.

E-mail address: iino.masamitsu@nihon-u.ac.jp

Supplementary Figures

A

| Indicator                                            | Amino acids position in calmodulin sequence |    |    |    |    |    |     |     |     |     | $K_d$ ( $\mu$ M)<br>for $\text{Ca}^{2+}$ | Dynamic<br>range | Hill<br>coefficient |
|------------------------------------------------------|---------------------------------------------|----|----|----|----|----|-----|-----|-----|-----|------------------------------------------|------------------|---------------------|
|                                                      | 31                                          | 36 | 60 | 63 | 77 | 92 | 101 | 111 | 127 | 133 |                                          |                  |                     |
| CEPIA2 (cfGCaMP2)                                    | E                                           | L  | N  | I  | K  | F  | S   | N   | E   | D   | 0.67                                     | 5.1              | 2.5                 |
| CEPIA3                                               | D                                           | L  | N  | I  | K  | F  | S   | N   | E   | D   | 14.5                                     | 5.0              | 1.5                 |
| CEPIA4                                               | D                                           | L  | N  | I  | K  | W  | S   | N   | E   | E   | 90.2                                     | 4.9              | 1.7                 |
| R-GECO1                                              | E                                           | M  | D  | F  | N  | F  | G   | D   | V   | D   | 0.19                                     | 22.2             | 2.2                 |
| R-CEPIA3*                                            | D                                           | M  | D  | F  | N  | F  | G   | D   | V   | D   | 3.7                                      | 30.0             | 1.0                 |
| R-CEPIA4*                                            | D                                           | M  | D  | F  | N  | W  | G   | D   | V   | E   | 26.9                                     | 23.9             | 1.5                 |
| R-GECO1 E31D/F92W/D133E<br>with cfGCaMP2 calmodulin# | D                                           | L  | N  | I  | K  | W  | S   | N   | E   | E   | 16.6                                     | 21.9             | 2.3                 |

\*Developed in current study        CEPIA mutations  
#Reference 15        Difference between R-GECOs and cfGCaMP2

in vitro properties at pH 7.2

B

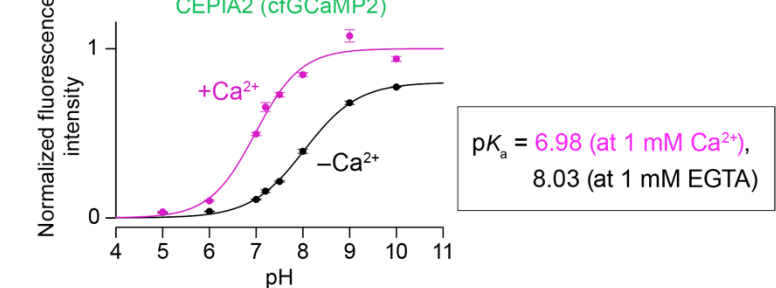

Supplementary Figure 1: Comparison of amino acids sequence of calmodulin in CEPIAs and pH titration curve of CEPIA2

A: Comparison of amino acids sequence of calmodulin in CEPIAs.

B: pH titration curve of CEPIA2 (cfGCaMP2) in Ca<sup>2+</sup>-containing (1 mM, magenta) or Ca<sup>2+</sup>-free (1 mM EGTA, black) solution. The plots were fitted by a single Hill equation. Mean  $\pm$  SEM ( $n = 3$ ).

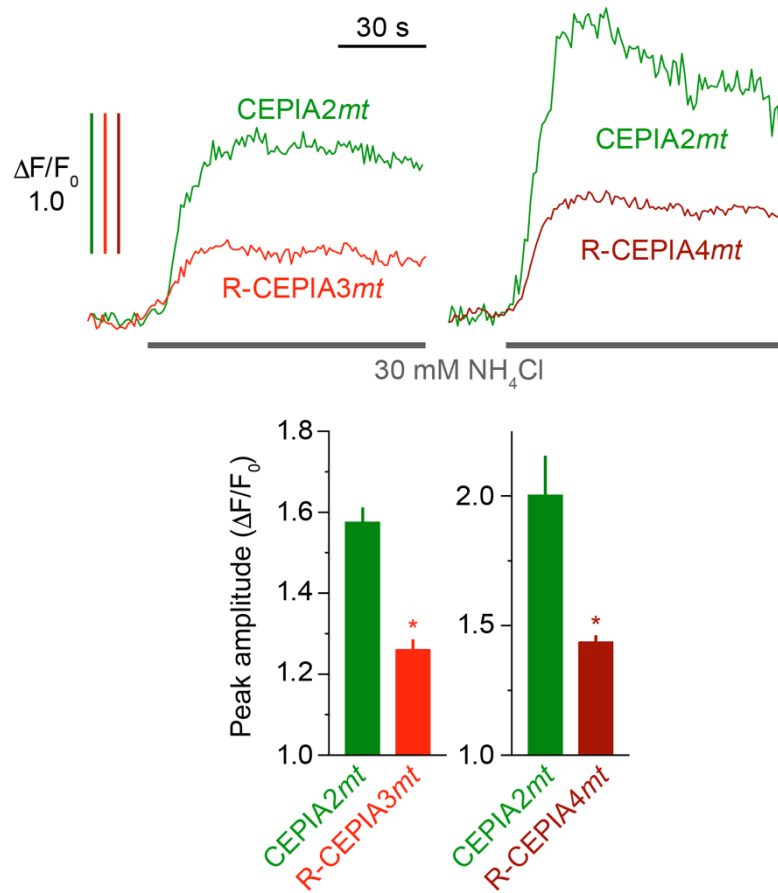

**Supplementary Figure 2: Effect of alkalization on fluorescence intensity of R-CEPIA3mt and R-CEPIA4mt**

Representative time courses and summarized graphs of the peak amplitude of alkalization-induced changes in the fluorescence intensity of mitochondrial CEPIAs. The data were obtained from HeLa cells expressing R-CEPIA3mt and CEPIA2mt (left) or R-CEPIA4mt and CEPIA2mt (right).  $n = 6$  and  $5$  (cells),  $*p = 6.64 \times 10^{-8}$  and  $1.43 \times 10^{-5}$ , for left and right graphs, respectively.

## Supplementary Table

**Supplementary Table 1: The list of primers.**

| Primer number | Sequence                        |
|---------------|---------------------------------|
| 1 (E31D)      | GGGCAGAACCCACAGAAGCAGAGCTCCAG   |
| 2 (E31D)      | CAGAGACCGCATCACCGTCCCCAGATCCTT  |
| 3 (F92W)      | GGGATAAGGATGGCAATGGCTACATCGGC   |
| 4 (F92W)      | ACACACGGAACGCTTCGCGAATTCCTCT    |
| 5 (D133E)     | ATCGATGGAGAAGGTCAGGTAAACTACGAA  |
| 6 (D133E)     | GTCTGCTACCCTGATCATTTTCATCAACCTC |

The primers used in the present study were listed. For the primers used for point mutations, the target mutation sites in calmodulin domain of R-GECO1 were indicated in parentheses.
